# Supplementary material for: Well-defined styryl and biphenyl calcium complexes from dilithio compounds and calcium iodide: synthesis, structure and reactivity toward nitrous oxide
Source: Royal Society of Chemistry journal article supplement (doi:10.1039/c8dt01046c), 2018-01-01
Supplement: c8dt01046c1.pdf [file c8dt01046c1.pdf]

*Cover Page for Supporting Information*

**Well-Defined Styryl and Biphenyl Calcium Complexes from Dilithio  
Compounds and Calcium Iodide: Synthesis, Structure and Reactivity  
toward Nitrous Oxide**

Baosheng Wei,<sup>a</sup> Wen-Xiong Zhang,<sup>\*a</sup> and Zhenfeng Xi<sup>\*a,b</sup>

*<sup>a</sup>Beijing National Laboratory for Molecular Sciences (BNLMS), Key Laboratory of Bioorganic Chemistry and Molecular Engineering of Ministry of Education, College of Chemistry, Peking University, Beijing 100871, China*

*<sup>b</sup>State Key Laboratory of Organometallic Chemistry, Shanghai Institute of Organic Chemistry (SIOC), Chinese Academy of Sciences, Shanghai 200032, China*

\*E-mail: zfxi@pku.edu.cn (Z.X.). wx\_zhang@pku.edu.cn (W.Z.).

*Table of Contents*

|                                                                                 |                |
|---------------------------------------------------------------------------------|----------------|
| <b>1) <sup>1</sup>H NMR and <sup>13</sup>C NMR Spectra of All New Compounds</b> | <b>S2–S6</b>   |
| <b>2) X-ray Crystallographic Study</b>                                          |                |
| <b>Table S1.</b> Crystal Data and Structure Refinement for <b>2</b> .           | <b>S7–S9</b>   |
| <b>Table S2.</b> Crystal Data and Structure Refinement for <b>5</b> .           | <b>S9–S10</b>  |
| <b>Table S3.</b> Crystal Data and Structure Refinement for <b>6</b> .           | <b>S10–S11</b> |

1)  $^1\text{H}$  NMR and  $^{13}\text{C}$  NMR Spectra of Compounds

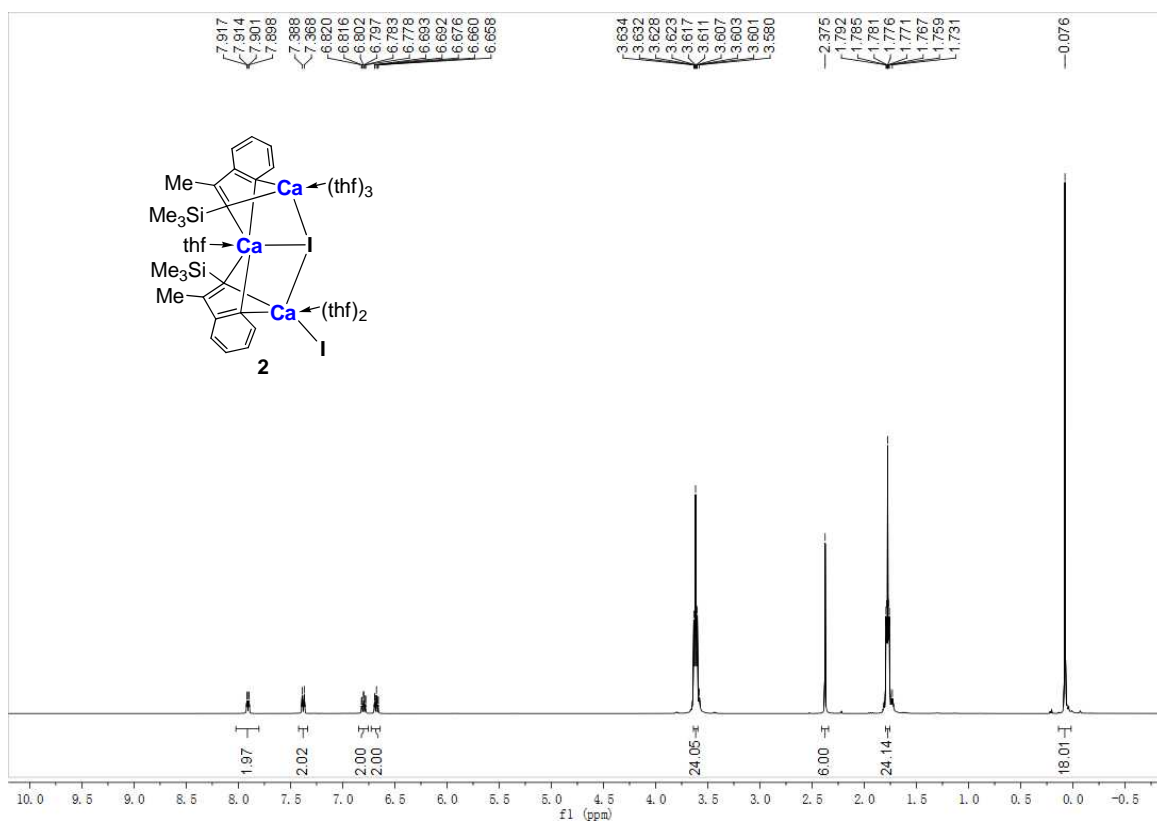

**Figure S1.  $^1\text{H}$  NMR Spectrum (400 MHz,  $d^8$ -THF) of Complex 2**

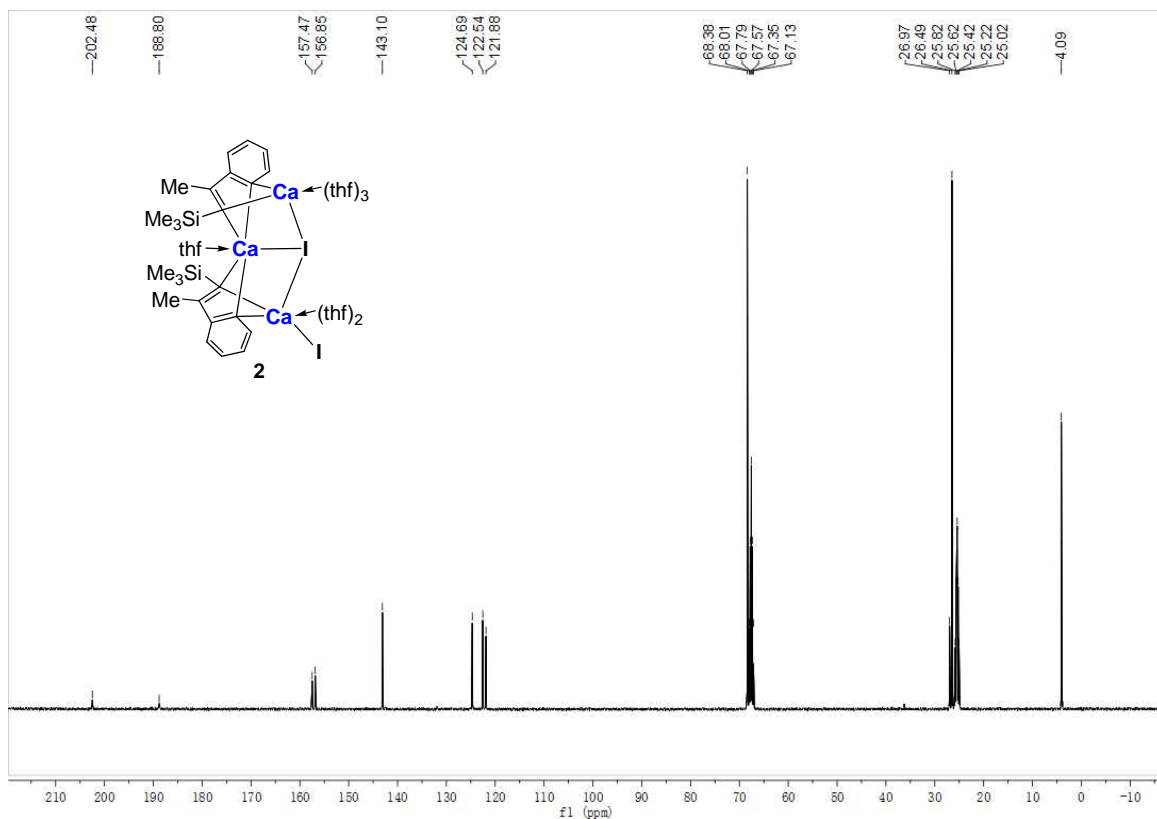

**Figure S2.  $^{13}\text{C}$  NMR Spectrum (100 MHz,  $d^8$ -THF) of Complex 2**

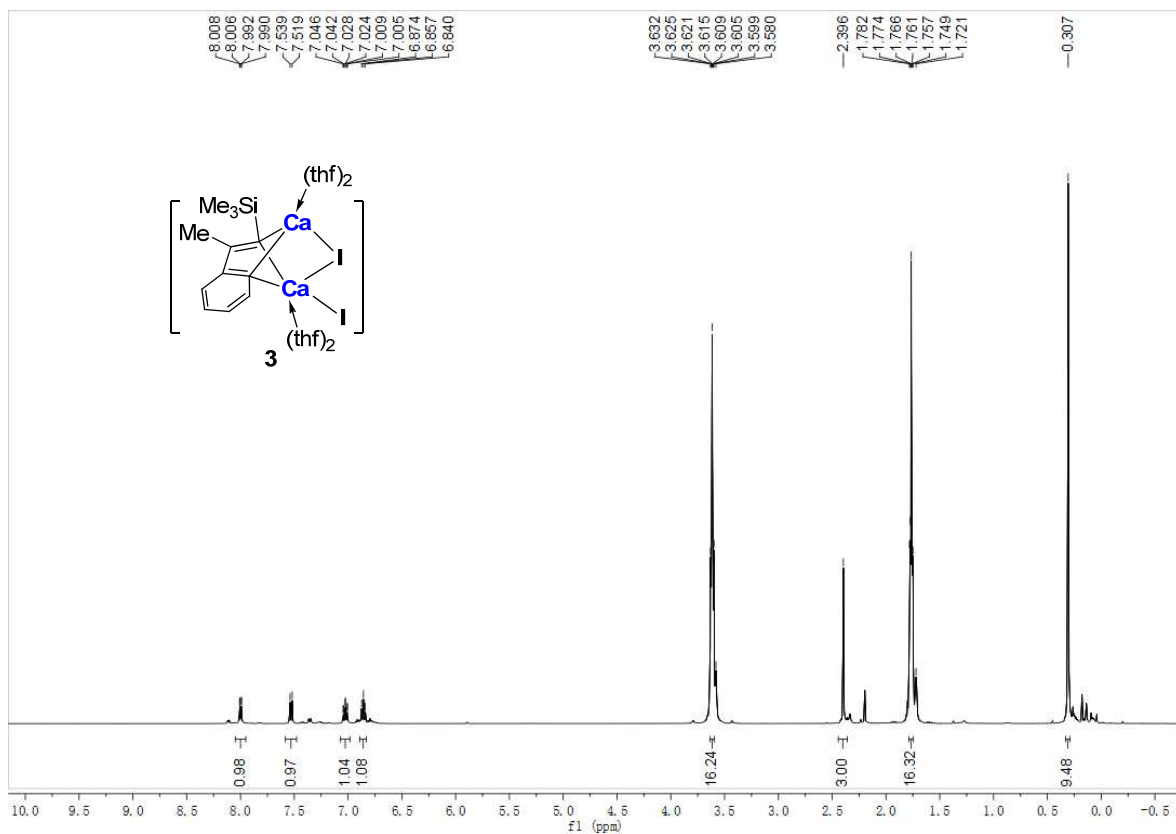

Figure S3. <sup>1</sup>H NMR Spectrum (400 MHz, *d*<sup>8</sup>-THF) of Intermediate **3**

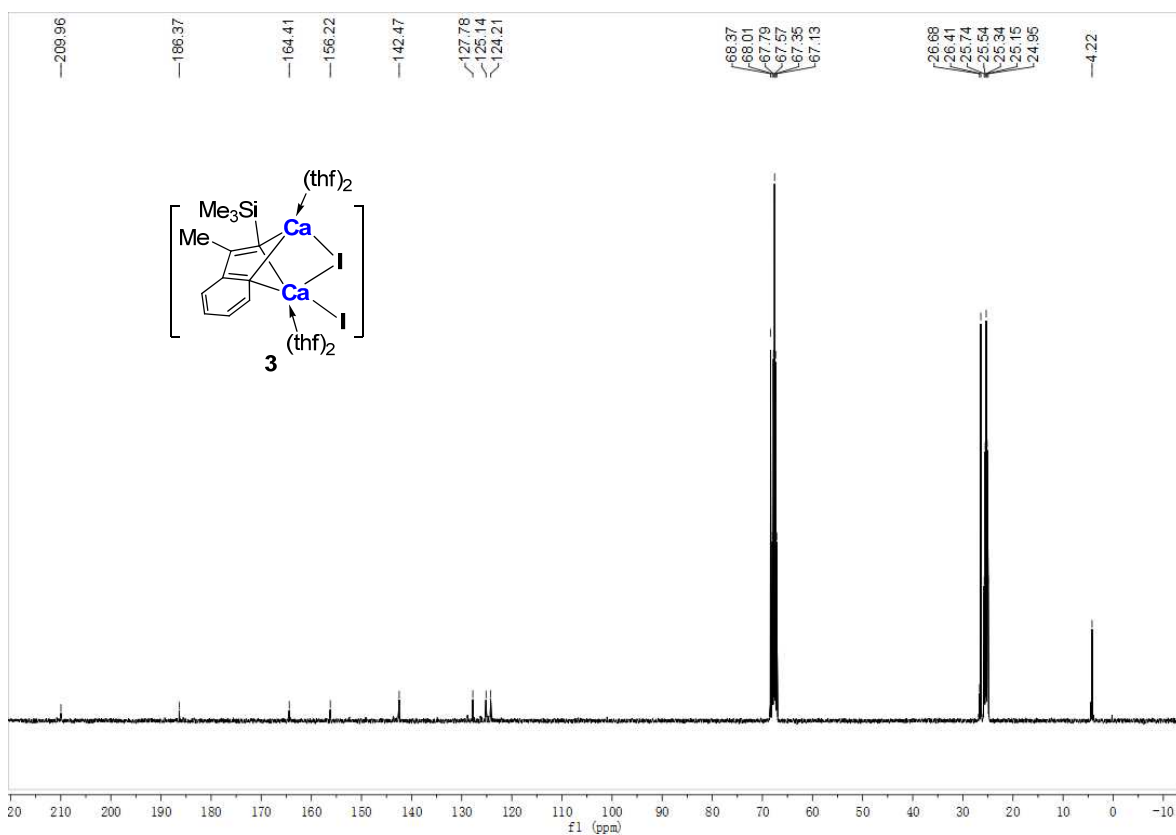

Figure S4. <sup>13</sup>C NMR Spectrum (100 MHz, *d*<sup>8</sup>-THF) of Intermediate **3**

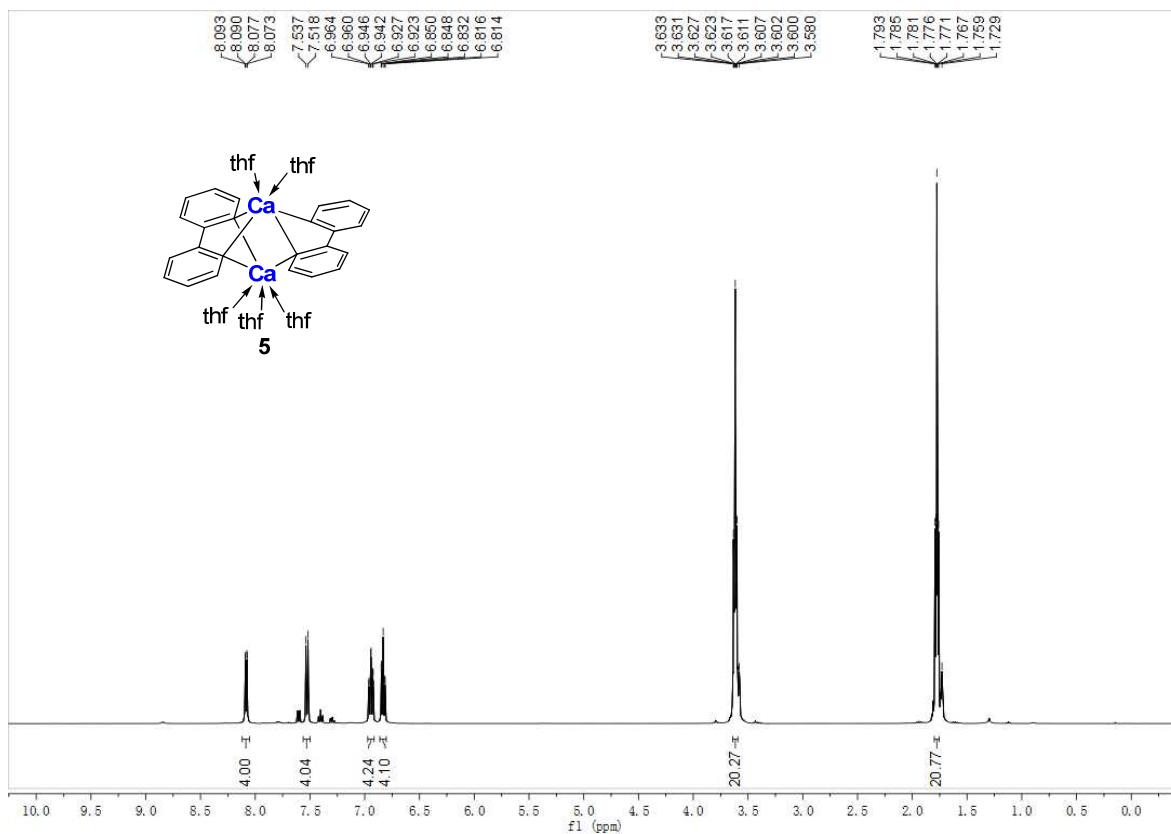

**Figure S5.** <sup>1</sup>H NMR Spectrum (400 MHz, *d*<sup>8</sup>-THF) of Complex 5

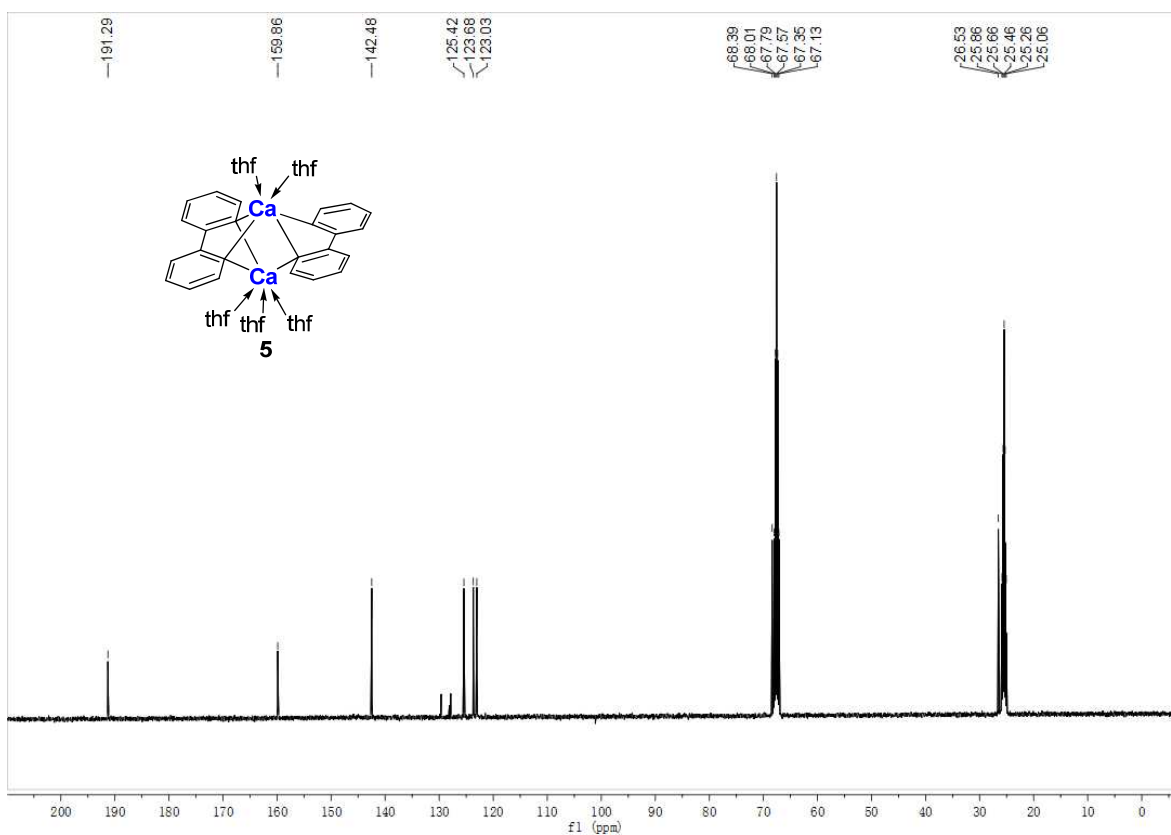

**Figure S6.** <sup>13</sup>C NMR Spectrum (100 MHz, *d*<sup>8</sup>-THF) of Complex 5

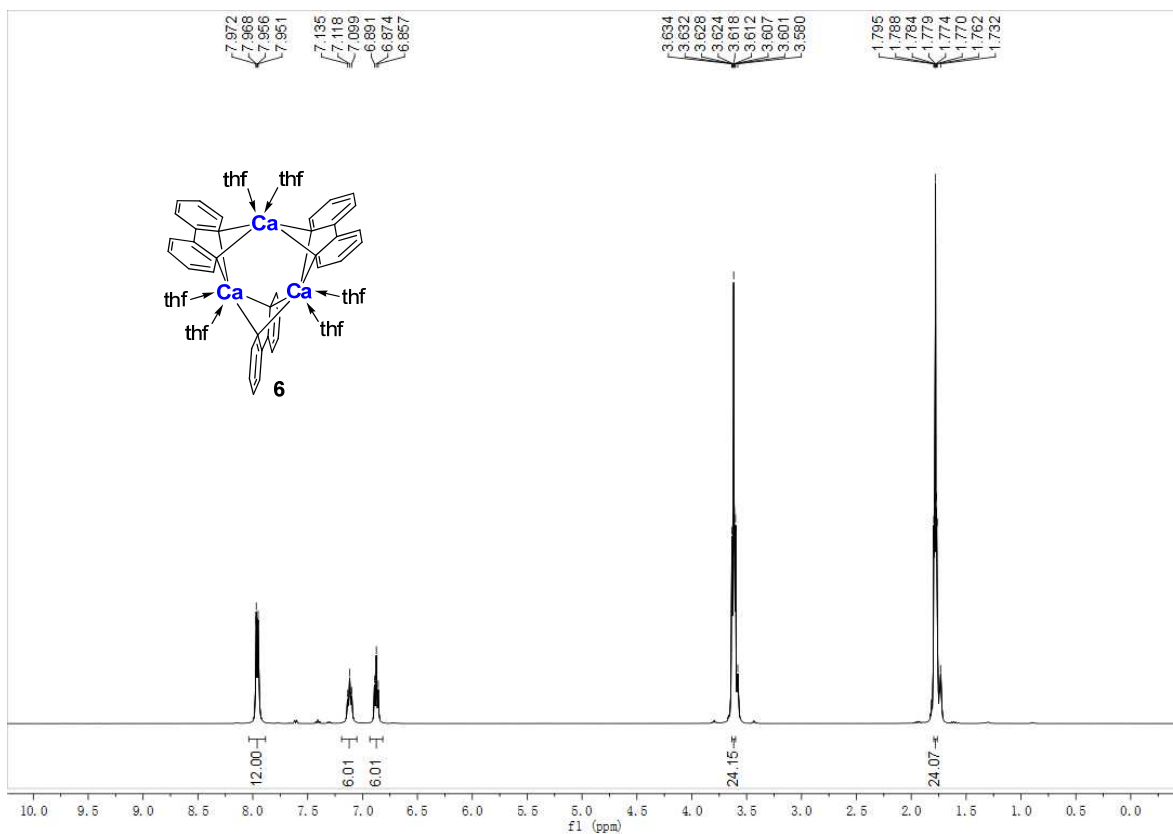

**Figure S7.** <sup>1</sup>H NMR Spectrum (400 MHz, *d*<sup>8</sup>-THF) of Complex 6

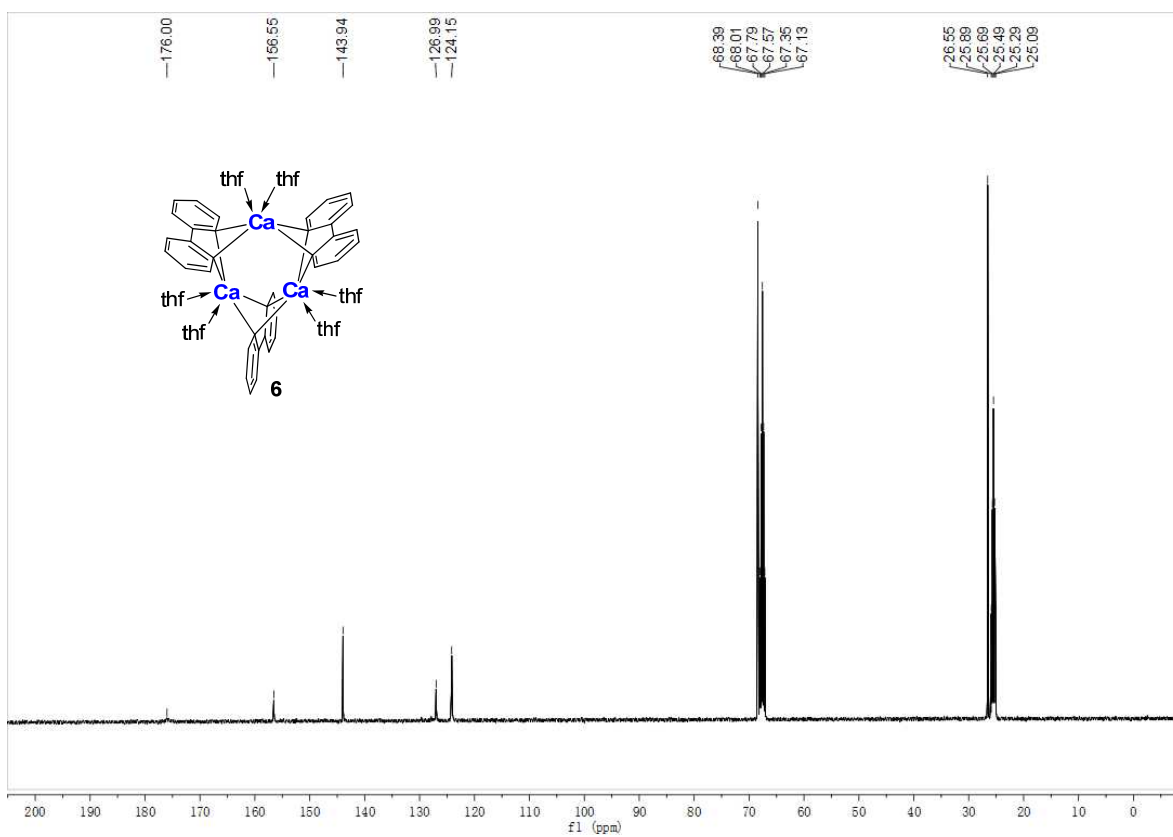

**Figure S8.** <sup>13</sup>C NMR Spectrum (100 MHz, *d*<sup>8</sup>-THF) of Complex 6

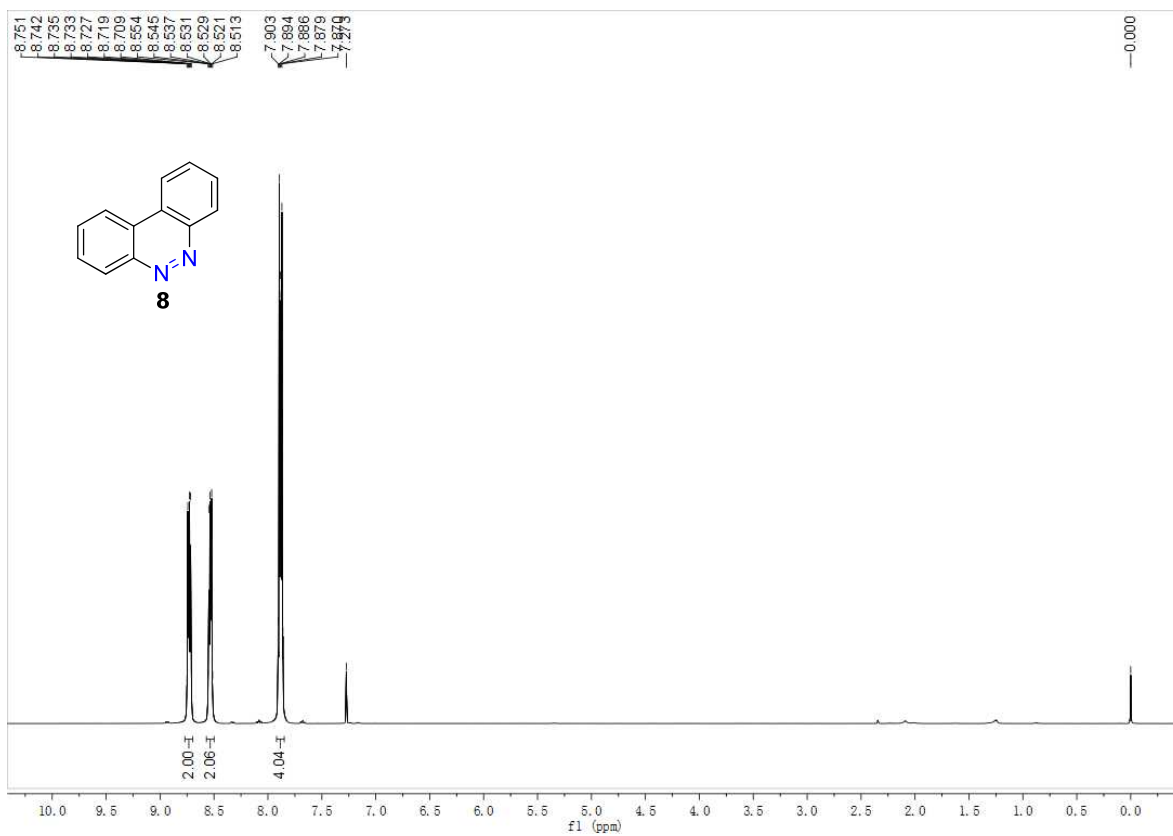

**Figure S9.** <sup>1</sup>H NMR Spectrum (400 MHz, CDCl<sub>3</sub>) of Compound **8**

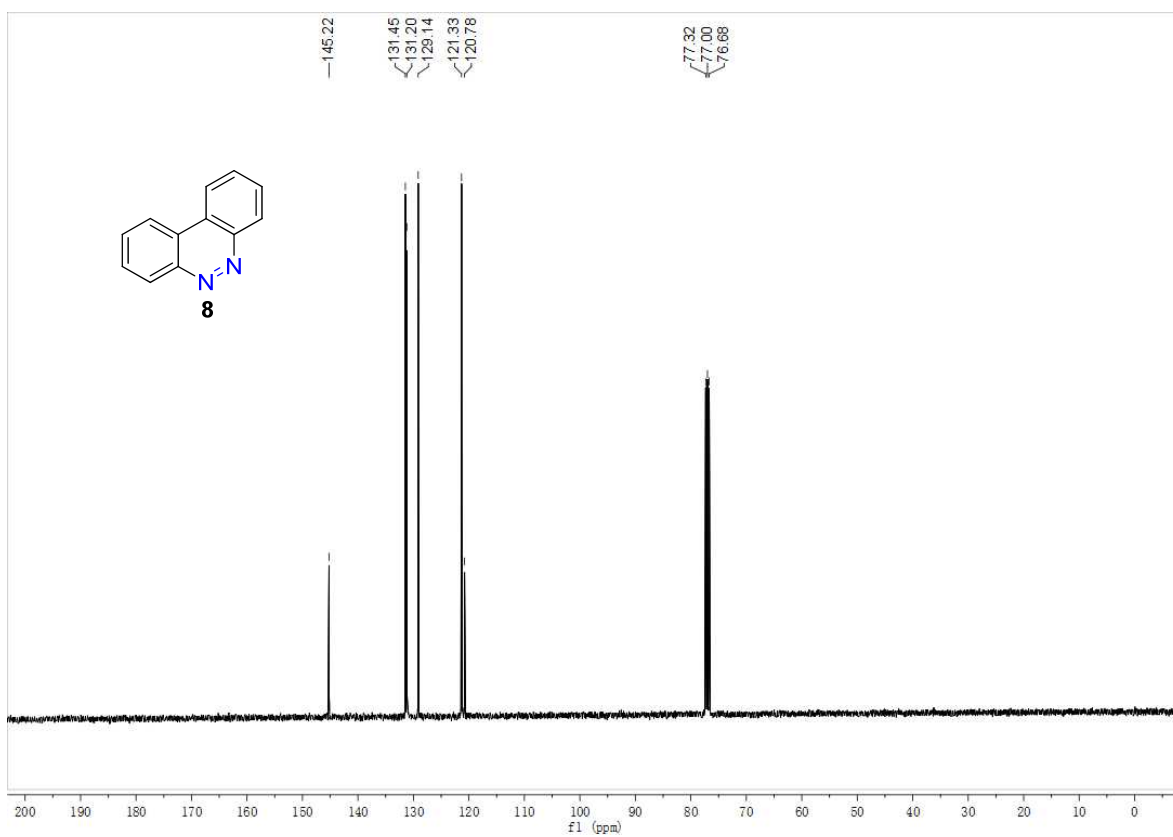

**Figure S10.** <sup>13</sup>C NMR Spectrum (100 MHz, CDCl<sub>3</sub>) of Compound **8**

## 2) X-ray Crystallographic Study

Single crystals of **2** suitable for X-ray analysis were grown in mixed Et<sub>2</sub>O/THF (20:1) solvent at -28°C for 3 days. Single crystals of **5** suitable for X-ray analysis were grown in THF at -28°C with exposure to hexane vapor for 3 days. Single crystals of **6** suitable for X-ray analysis were grown in toluene/THF (10:1) at -28°C with exposure to hexane vapor for 3 days. Data collections for them were performed at 180 K or 130 K on a XtaLAB Pro: Kappa single diffractometer using Mo K $\alpha$  radiation ( $\lambda = 0.71073 \text{ \AA}$ ). Using Olex2, the structures were solved with Superflip solution program using Charge Flipping or ShelXS-97 solution program using Direct Methods and refined with the ShelXL refinement package using Least Squares minimization. Refinement was performed on  $F^2$  anisotropically for all the non-hydrogen atoms by the full-matrix least-squares method. The hydrogen atoms were placed at the calculated positions and were included in the structure calculation without further refinement of the parameters. A very large solvent accessible void in **2** was squeezed by using Platon. In all of the structures, the commands DELU, SIMU and ISOR were applied to mostly restrain the disorders of coordinated THF molecules. In the structure of **6**, the command AFIX 66 was applied to constrain one benzene ring. Crystallographic data (excluding structure factors) have been deposited with the Cambridge Crystallographic Data Centre as supplementary publication nos. CCDC-1823281 (**2**), CCDC-1823282 (**5**), CCDC-1823283 (**6**). Copies of these data can be obtained free of charge from the Cambridge Crystallographic Data Centre via [www.ccdc.cam.ac.uk/data\\_request/cif](http://www.ccdc.cam.ac.uk/data_request/cif).

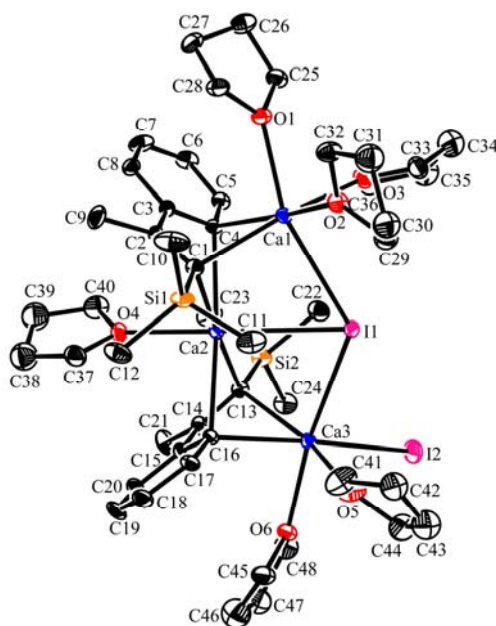

**Figure S11.** ORTEP drawing of **2** with 20% thermal ellipsoids. Hydrogen atoms have been omitted for clarity.

**Table S1 Crystal data and structure refinement for 2.**

|                                             |                                                                                               |
|---------------------------------------------|-----------------------------------------------------------------------------------------------|
| Identification code                         | <b>2</b>                                                                                      |
| Empirical formula                           | C <sub>48</sub> H <sub>80</sub> Ca <sub>3</sub> I <sub>2</sub> O <sub>6</sub> Si <sub>2</sub> |
| Formula weight                              | 1183.34                                                                                       |
| Temperature/K                               | 180.0(3)                                                                                      |
| Crystal system                              | orthorhombic                                                                                  |
| Space group                                 | P2 <sub>1</sub> 2 <sub>1</sub> 2 <sub>1</sub>                                                 |
| a/Å                                         | 12.3201(2)                                                                                    |
| b/Å                                         | 17.4852(4)                                                                                    |
| c/Å                                         | 34.1897(6)                                                                                    |
| α/°                                         | 90                                                                                            |
| β/°                                         | 90                                                                                            |
| γ/°                                         | 90                                                                                            |
| Volume/Å <sup>3</sup>                       | 7365.1(2)                                                                                     |
| Z                                           | 4                                                                                             |
| ρ <sub>calc</sub> /cm <sup>3</sup>          | 1.067                                                                                         |
| μ/mm <sup>-1</sup>                          | 1.127                                                                                         |
| F(000)                                      | 2440.0                                                                                        |
| Crystal size/mm <sup>3</sup>                | 0.1 × 0.1 × 0.1                                                                               |
| Radiation                                   | MoKα (λ = 0.71073)                                                                            |
| 2θ range for data collection/°              | 7.014 to 52.042                                                                               |
| Index ranges                                | -15 ≤ h ≤ 15, -21 ≤ k ≤ 21, -42 ≤ l ≤ 42                                                      |
| Reflections collected                       | 141676                                                                                        |
| Independent reflections                     | 14478 [R <sub>int</sub> = 0.0362, R <sub>sigma</sub> = 0.0170]                                |
| Data/restraints/parameters                  | 14478/160/558                                                                                 |
| Goodness-of-fit on F <sup>2</sup>           | 1.142                                                                                         |
| Final R indexes [I ≥ 2σ (I)]                | R <sub>1</sub> = 0.0511, wR <sub>2</sub> = 0.1492                                             |
| Final R indexes [all data]                  | R <sub>1</sub> = 0.0538, wR <sub>2</sub> = 0.1520                                             |
| Largest diff. peak/hole / e Å <sup>-3</sup> | 1.33/-0.78                                                                                    |



Flack parameter

0.191(4)

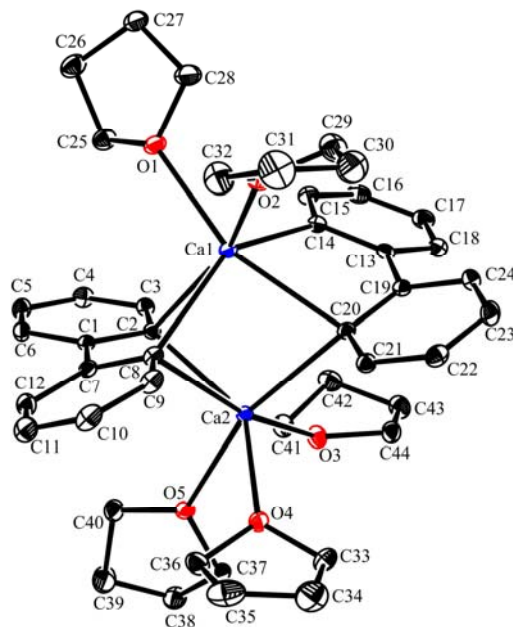

**Figure S12.** ORTEP drawing of **5** with 20% thermal ellipsoids. Hydrogen atoms have been omitted for clarity.

**Table S2 Crystal data and structure refinement for 5.**

|                       |                                                                |
|-----------------------|----------------------------------------------------------------|
| Identification code   | <b>5</b>                                                       |
| Empirical formula     | C <sub>44</sub> H <sub>56</sub> Ca <sub>2</sub> O <sub>5</sub> |
| Formula weight        | 745.04                                                         |
| Temperature/K         | 179.99(10)                                                     |
| Crystal system        | monoclinic                                                     |
| Space group           | P2 <sub>1</sub> /c                                             |
| a/Å                   | 16.1464(3)                                                     |
| b/Å                   | 14.7588(2)                                                     |
| c/Å                   | 20.6595(5)                                                     |
| $\alpha$ /°           | 90                                                             |
| $\beta$ /°            | 126.1900(10)                                                   |
| $\gamma$ /°           | 90                                                             |
| Volume/Å <sup>3</sup> | 3973.32(14)                                                    |

|                                                |                                                               |
|------------------------------------------------|---------------------------------------------------------------|
| Z                                              | 4                                                             |
| $\rho_{\text{calc}}/\text{cm}^3$               | 1.245                                                         |
| $\mu/\text{mm}^{-1}$                           | 0.331                                                         |
| F(000)                                         | 1600.0                                                        |
| Crystal size/ $\text{mm}^3$                    | $0.1 \times 0.1 \times 0.1$                                   |
| Radiation                                      | MoK $\alpha$ ( $\lambda = 0.71073$ )                          |
| 2 $\theta$ range for data collection/ $^\circ$ | 6.79 to 52.044                                                |
| Index ranges                                   | $-17 \leq h \leq 19, -18 \leq k \leq 18, -25 \leq l \leq 25$  |
| Reflections collected                          | 47278                                                         |
| Independent reflections                        | 7796 [ $R_{\text{int}} = 0.0382, R_{\text{sigma}} = 0.0258$ ] |
| Data/restraints/parameters                     | 7796/52/460                                                   |
| Goodness-of-fit on $F^2$                       | 1.046                                                         |
| Final R indexes [ $I \geq 2\sigma(I)$ ]        | $R_1 = 0.0395, wR_2 = 0.1043$                                 |
| Final R indexes [all data]                     | $R_1 = 0.0479, wR_2 = 0.1098$                                 |
| Largest diff. peak/hole / $e \text{ \AA}^{-3}$ | 0.72/-0.56                                                    |

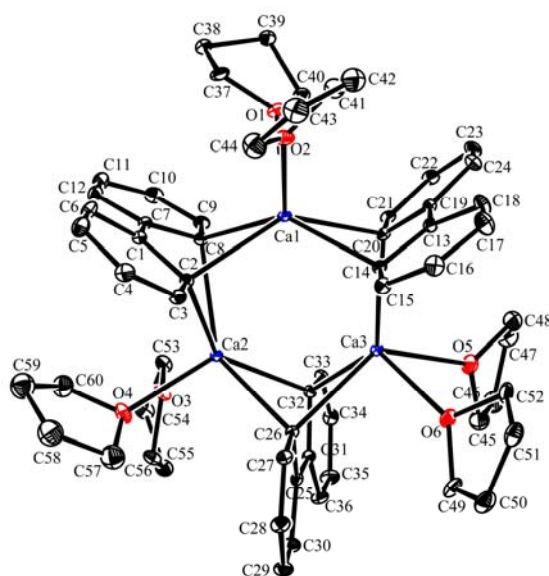

**Figure S13.** ORTEP drawing of **6** with 20% thermal ellipsoids. Hydrogen atoms have been omitted for clarity.

**Table S3 Crystal data and structure refinement for 6.**

|                                             |                                                                |
|---------------------------------------------|----------------------------------------------------------------|
| Identification code                         | 6                                                              |
| Empirical formula                           | C <sub>60</sub> H <sub>72</sub> Ca <sub>3</sub> O <sub>6</sub> |
| Formula weight                              | 1009.41                                                        |
| Temperature/K                               | 130.00(10)                                                     |
| Crystal system                              | triclinic                                                      |
| Space group                                 | P-1                                                            |
| a/Å                                         | 10.2714(2)                                                     |
| b/Å                                         | 21.1518(5)                                                     |
| c/Å                                         | 37.3847(5)                                                     |
| α/°                                         | 88.6660(10)                                                    |
| β/°                                         | 85.4240(10)                                                    |
| γ/°                                         | 80.768(2)                                                      |
| Volume/Å <sup>3</sup>                       | 7990.9(3)                                                      |
| Z                                           | 6                                                              |
| ρ <sub>calc</sub> /cm <sup>3</sup>          | 1.259                                                          |
| μ/mm <sup>-1</sup>                          | 0.360                                                          |
| F(000)                                      | 3240.0                                                         |
| Crystal size/mm <sup>3</sup>                | 0.1 × 0.1 × 0.1                                                |
| Radiation                                   | MoKα (λ = 0.71073)                                             |
| 2θ range for data collection/°              | 6.71 to 52.044                                                 |
| Index ranges                                | -12 ≤ h ≤ 12, -26 ≤ k ≤ 26, -46 ≤ l ≤ 46                       |
| Reflections collected                       | 191741                                                         |
| Independent reflections                     | 31373 [R <sub>int</sub> = 0.0557, R <sub>sigma</sub> = 0.0353] |
| Data/restraints/parameters                  | 31373/761/1852                                                 |
| Goodness-of-fit on F <sup>2</sup>           | 1.011                                                          |
| Final R indexes [I ≥ 2σ (I)]                | R <sub>1</sub> = 0.0986, wR <sub>2</sub> = 0.2379              |
| Final R indexes [all data]                  | R <sub>1</sub> = 0.1137, wR <sub>2</sub> = 0.2495              |
| Largest diff. peak/hole / e Å <sup>-3</sup> | 1.82/-1.67                                                     |
